# Supplementary material
Source: PubMed Central journal article supplement (PMC4418502)
Supplement: NIHMS683046-supplement-Supp.pdf [file NIHMS683046-supplement-Supp.pdf]

# THE LANCET **Neurology**

## **Supplementary webappendix**

This webappendix formed part of the original submission and has been peer reviewed. We post it as supplied by the authors.

Supplement to: Grandjean P, Landrigan PJ. Neurobehavioural effects of developmental toxicity. *Lancet Neurol* 2014; published online Feb 15. [http://dx.doi.org/10.1016/S1474-4422\(13\)70278-3](http://dx.doi.org/10.1016/S1474-4422(13)70278-3).

## Supplementary webappendix

Grandjean P, Landrigan PJ. Neurobehavioural effects of developmental toxicity

**Appendix table 1.** Chemicals known to be human neurotoxicants

| CAS number                            | Compound                          |
|---------------------------------------|-----------------------------------|
| <i>Metals and inorganic compounds</i> |                                   |
| 7429905                               | Aluminum                          |
| 7440382                               | Arsenic and arsenic compounds     |
| 14343692                              | Azides                            |
| 7440393                               | Barium compounds                  |
| 7440699                               | Bismuth compounds                 |
| 630080                                | Carbon monoxide                   |
| 57125                                 | Cyanides                          |
| 17702419                              | Decaborane                        |
| 19287457                              | Diborane                          |
| 627441                                | Ethylmercury                      |
| 16984488                              | Fluorides                         |
| 7783064                               | Hydrogen phosphide                |
| 78002                                 | Hydrogen sulfide                  |
| 7439932                               | Lead and lead compounds           |
| 7439965                               | Lithium compounds                 |
| 7439976                               | Manganese and manganese compounds |
| 22967926                              | Mercury and mercuric compounds    |
| 13463393                              | Methylmercury                     |
| 19624227                              | Nickel carbonyl                   |
| 7803512                               | Pentaborane                       |
| 7723140                               | Phosphine                         |
| 7782492                               | Phosphorus                        |
| 13494809                              | Selenium compounds                |
| 7440280                               | Tellurium compounds               |
| 7440315                               | Thallium compounds                |
| 7429905                               | Tin compounds                     |
| <i>Organic solvents</i>               |                                   |
| 67641                                 | Acetone                           |
| 71432                                 | Benzene                           |
| 100516                                | Benzyl alcohol                    |
| 106945                                | 1-Bromopropane                    |
| 75150                                 | Carbon disulfide                  |
| 67663                                 | Chloroform                        |
| 110827                                | Cyclohexane                       |
| 108930                                | Cyclohexanol                      |
| 108941                                | Cyclohexanone                     |
| 106934                                | 1,2-Dibromoethane                 |
| 79436                                 | Dichloroacetic acid               |

---

|         |                                                                    |
|---------|--------------------------------------------------------------------|
| 75092   | Dichloromethane                                                    |
| 111466  | Diethylene glycol                                                  |
| 68122   | N,N-Dimethylformamide                                              |
| 64175   | Ethanol (Alcohol)                                                  |
| 141786  | Ethyl acetate                                                      |
| 107211  | Ethyl chloride                                                     |
| 110805  | Ethylene glycol                                                    |
| 109864  | Ethylene glycol ethyl ether (Ethoxyethanol)                        |
| 111466  | Ethylene glycol methyl ether (Methoxyethanol or Methyl cellosolve) |
| 110543  | n-Hexane                                                           |
| 78591   | Isophorone                                                         |
| 67630   | Isopropyl alcohol                                                  |
| 67561   | Methanol (Methyl alcohol)                                          |
| 591786  | Methyl-n-butyl ketone (2-Hexanone)                                 |
| 96377   | Methylcyclopentane                                                 |
| 78933   | Methyl ethyl ketone                                                |
| 108101  | Methyl isobutyl ketone                                             |
| 78820   | 2-Methylpropanenitrile                                             |
| 98953   | Nitrobenzene                                                       |
| 79469   | 2-Nitropropane                                                     |
| 71410   | 1-Pentanol                                                         |
| 110861  | Pyridine                                                           |
| 100425  | Styrene                                                            |
| 79345   | 1,1,2,2-Tetrachloroethane                                          |
| 127184  | Tetrachloroethylene (Perchloroethylene)                            |
| 108883  | Toluene                                                            |
| 71556   | 1,1,1-Trichloroethane (Methylchloroform)                           |
| 79016   | Trichloroethylene                                                  |
| 1330207 | Xylenes                                                            |

---

*Other organic substances*

---

|           |                                                        |
|-----------|--------------------------------------------------------|
| 75865     | Acetone cyanohydrin (2-Hydroxy-2-methylpropanenitrile) |
| 79061     | Acrylamide (2-Propenamide)                             |
| 107131    | Acrylonitrile                                          |
| 107051    | Allyl chloride (1-Chloro-2-propene)                    |
| 62533     | Aniline                                                |
| 106503    | 1,4-Benzenediamine (4-Aminoaniline)                    |
| 91156     | 1,2-Benzenedicarbonitrile (1,2-Dicyanobenzene)         |
| 100470    | Benzonitrile                                           |
| 106990    | 1,3-Butadiene                                          |
| 220352352 | Butylated triphenyl phosphate                          |
| 105602    | Caprolactam (Azepan-2-one)                             |
| 126998    | Chloroprene                                            |
| 98828     | Cumene                                                 |
| 121824    | Cyclonite (RDX)                                        |
| 4074888   | Diethylene glycol diacrylate                           |
| 84742     | Di-N-butyl phthalate                                   |
| 77781     | Dimethyl sulfate                                       |
| 30260663  | Dimethylhydrazine                                      |

---

|                   |                                            |
|-------------------|--------------------------------------------|
| 1738256           | 3-(Dimethylamino)-propanenitrile           |
| 25154545          | Dinitrobenzene                             |
| 25321146          | Dinitrotoluene                             |
| 538078            | Ethylbis(2-chloroethyl)amine               |
| 74851             | Ethylene                                   |
| 75218             | Ethylene oxide                             |
| 640197            | Fluoroacetamide                            |
| 144490            | Fluoroacetate                              |
| 70304             | Hexachlorophene                            |
| 302012            | Hydrazine                                  |
| 123319            | Hydroquinone                               |
| 74873             | Methyl chloride (Chloromethane)            |
| 107313            | Methyl formate                             |
| 74884             | Methyl iodide                              |
| 80626             | Methyl methacrylate                        |
| 100016            | 4-Nitroaniline                             |
| 108952            | Phenol                                     |
| 100630            | Phenylhydrazine                            |
| 67774327          | Polybrominated biphenyls (PBBs)            |
| 63936561          | Polybrominated diphenyl ethers (PBDEs)     |
| 1336363           | Polychlorinated biphenyls (PCBs)           |
| 75569             | 1,2-Propylene oxide                        |
| 1746016           | 2,3,7,8-Tetrachlorodibenzo-p-dioxin (TCDD) |
| 126738            | Tributyl phosphate                         |
| 78308             | Tri-o-cresylphosphate                      |
| 512561            | Trimethyl phosphate                        |
| 115866            | Triphenyl phosphate                        |
| 555771            | Tris(2-chloroethyl)amine (Trichlormethine) |
| 75014             | Vinyl chloride (Chloroethene)              |
| <i>Pesticides</i> |                                            |
| 135410207         | Acetamiprid                                |
| 116063            | Aldicarb (Temik)                           |
| 309002            | Aldrin                                     |
| 33089611          | Amitraz                                    |
| 65195553          | Avermectin                                 |
| 741582            | Bensulide                                  |
| 2104963           | Bromophos (Brofene)                        |
| 63252             | Carbaryl (Sevin)                           |
| 1563662           | Carbofuran (Furadan)                       |
| 786196            | Carbophenothion (Trithion)                 |
| 15879933          | $\alpha$ -Chloralose                       |
| 12789036          | Chlordane                                  |
| 470906            | Chlorfenvinphos                            |
| 24934916          | Chlormephos                                |
| 500287            | Chlorothion                                |
| 2921882           | Chlorpyrifos (Dursban, Lorsban)            |
| 56724             | Coumaphos                                  |
| 68085858          | Cyhalothrin (Karate)                       |

---

|           |                                                        |
|-----------|--------------------------------------------------------|
| 947024    | Cyolane (Phospholan)                                   |
| 52315078  | Cypermethrin                                           |
| 52918635  | Deltamethrin (Decamethrin)                             |
| 919868    | Demeton-S-methyl                                       |
| 10311849  | Dialifor                                               |
| 333415    | Diazinon                                               |
| 97176     | Dichlofenthion                                         |
| 96128     | 1,2-Dibromo-3-chloropropane (DBCP)                     |
| 50293     | Dichlorodiphenyltrichloroethane (DDT)                  |
| 94757     | 2,4-Dichlorophenoxyacetic acid (2,4-D)                 |
| 542756    | 1,3-Dichloropropene                                    |
| 62737     | Dichlorvos (DDVP, Vapona)                              |
| 60571     | Dieldrin                                               |
| 115264    | Dimefox                                                |
| 60515     | Dimethoate                                             |
| 534521    | 4,6-Dinitro-o-cresol                                   |
| 88857     | Dinoseb                                                |
| 78342     | Dioxathion                                             |
| 298044    | Disulfoton                                             |
| 17109498  | Edifenphos                                             |
| 119791412 | Emamectin                                              |
| 115297    | Endosulfan (Thiodan)                                   |
| 2778043   | Endothion                                              |
| 72208     | Endrin                                                 |
| 29973135  | Ethiofencarb (Croneton)                                |
| 563122    | Ethion                                                 |
| 13194484  | Ethoprop                                               |
| 2104645   | O-Ethyl O-(4-nitrophenyl) phenylphosphonothioate (EPN) |
| 122145    | Fenitrothion                                           |
| 115902    | Fensulfothion                                          |
| 55389     | Fenthion                                               |
| 51630581  | Fenvalerate                                            |
| 120068373 | Fipronil (Termidor)                                    |
| 944229    | Fonofos                                                |
| 2540821   | Formothion                                             |
| 1071836   | Glyphosate                                             |
| 76448     | Heptachlor                                             |
| 23560590  | Heptenophos                                            |
| 118741    | Hexachlorobenzene                                      |
| 79983714  | Hexaconazole                                           |
| 138261413 | Imidacloprid                                           |
| 297789    | Isobenzan                                              |
| 119380    | Isolan                                                 |
| 18854018  | Isoxathion                                             |
| 143500    | Kepone (Chlordecone)                                   |
| 21609905  | Leptophos                                              |
| 58899     | Lindane ( $\gamma$ -Hexachlorocyclohexane)             |
| 150505    | Merphos                                                |

---

---

|          |                                             |
|----------|---------------------------------------------|
| 108623   | Metaldehyde                                 |
| 10265926 | Methamidophos                               |
| 950378   | Methidathion (Suprathion)                   |
| 16752775 | Methomyl                                    |
| 74839    | Methyl bromide                              |
| 298000   | Methyl parathion (Parathion-methyl)         |
| 7786347  | Mevinphos                                   |
| 315184   | Mexacarbate (Zectran)                       |
| 371868   | Mipafox                                     |
| 2385855  | Mirex                                       |
| 6923224  | Monocrotophos                               |
| 300765   | Naled                                       |
| 54115    | Nicotine                                    |
| 301122   | Oxydemeton-methyl                           |
| 56382    | Parathion                                   |
| 87865    | Pentachlorophenol                           |
| 298022   | Phorate                                     |
| 13171216 | Phosphamidon (Dimecron)                     |
| 7292162  | Propaphos                                   |
| 114261   | Propoxur (Baygon)                           |
| 53558251 | Pyriminil (Pyrinuron, Vacor)                |
| 107448   | Sarin                                       |
| 152169   | Schradan                                    |
| 96640    | Soman                                       |
| 35400432 | Sulprofos                                   |
| 8065483  | Systox (Demeton)                            |
| 96182535 | Tebupirimfos                                |
| 79538322 | Tefluthrin                                  |
| 13071799 | Terbufos                                    |
| 80126    | Tetramethylenedisulfotetramine (Tetramine)  |
| 137268   | Thiram                                      |
| 8001352  | Toxaphene                                   |
| 93765    | 2,4,5-Trichlorophenoxyacetic acid (2,4,5-T) |
| 52686    | Trichlorfon                                 |
| 327980   | Trichloronate                               |

---
